# Supplementary material
Source: publisher figshare collection journal article supplement (https://gsajournals.figshare.com/ndownloader/files/22007679)
Supplement: Supplementary file 1 [file 22007679]

## Sheet: Sheet1
Table S6. Estimated haploid genome sizes (1C) estimated by flow cytometry.
Species	Isolate	Replicates	Mean 1C (Mbp)	SD (Mbp)
P. megakarya	Pm1	3	231.467	0.967385
P. megakarya	Pm2	3	224.817	16.7184
P. megakarya	Pm4	3	241.917	6.35715
P. megakarya	Pm8	3	206.3	11.5695
P. megakarya	Pm15	3	220.283	8.63139
P. palmivora	Pp2	4	126.662	2.5283
P. palmivora	Pp3	3	132.983	3.92248
P. palmivora	Pp7	3	122.3	1.0332
P. palmivora	Pp14	3	121.05	3.30454
P. palmivora	Pp15	3	125.983	3.5307
